# Supplementary material for: Effect of Umbilical Cord Milking on Severity of Hypoxic Ischemic Encephalopathy in Asphyxiated Neonates – A Pilot study
Source: bioRxiv or medRxiv preprint supplement (doi:10.1101/2021.05.26.21257569), 2021-05-27
Supplement: Supplementary file [file media-1.pdf]

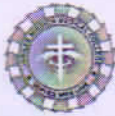

# JUBILEE MISSION MEDICAL COLLEGE & RESEARCH INSTITUTE

THRISSUR 680 005, KERALA

## Institutional Ethics Committee Certificate

The Institutional Ethics Committee, Jubilee Mission Medical College, Thrissur has gone through the details of the Clinical research work

Ref. No : 01/17/IEC/JMMC & RI  
 Name : DR. VARANATTU C MANOJ  
 Course : MD/MS/DNB/Other (Specify)  
 Department : NEONATOLOGY  
 Title : ROLE OF UMBILICAL CORD MILKING IN THE MANAGEMENT OF HYPOXIC-ISCHEMIC ENCEPHALOPATHY IN NEONATES: A RANDOMIZED CONTROLLED TRIAL

Name of Guide/ Co-Guide : INVESTIGATORS: DR. BINDU MENON / DR. ASHWATH KUMAR

Approval Date : 04.01.2017

and has decided to give permission to proceed with the study / publish the article.

Researchers shall inform the Institutional Ethics Committee,

On completion of the study

If any difficulty may arise during the clinical trial or

If the study is dropped quoting the reason.

Secretary  
SECRETARY  
ETHICS COMMITTEE  
JMMC & RI, THRISSUR 5  
Date : .....

CHAIRPERSON  
Chairperson  
ETHICS COMMITTEE  
JMMC & RI, THRISSUR  
Place : .....



File No. ECR/1411/Jubilee/Inst/KL/2016

**Government of India**  
Ministry of Health & Family Welfare  
Directorate General of Health Services  
Office of Drugs Controller General (India)  
Central Drugs Standard Control Organization

FDA Bhawan, Kotla Road,  
New Delhi – 110 002, India  
Dated: 05/08/2016

To,

**The Chairman**  
**Institutional Ethics Committee,**  
**Jubilee Mission Medical College & Research Institute,**  
**P. B. No. 737, Bishop Alappatt Road, Jubilee Mission P. O.,**  
**Thrissur East-680005, Kerala, India.**

**Subject:** Ethics Committee Registration No. **ECR/835/KL/Inst/2016** issued under Rule 122DD of the  
Drugs & Cosmetics Rules 1945

Sir/Madam,

Please refer to your application no. JMMCI EDCGI/2014/001 dated 12.12.2015 submitted to this office for the registration of Ethics Committee.

Your Ethics Committee is hereby registered under Rule 122DD vide Registration No. **ECR/835/KL/Inst/2016** with the following composition and all the condition mentioned under the Registration certificate issued to you.

| Sr. No. | Name of member               | Qualification               | Role/Designation in Ethics Committee |
|---------|------------------------------|-----------------------------|--------------------------------------|
| 1.      | Dr. Zacharias Cherian        | M.Sc (Pharmacology), B.V.Sc | Chairman                             |
| 2.      | Dr. M.P. Raphael             | MD (Pharmacology)           | Member Secretary                     |
| 3.      | Dr. K.B. Mohan               | MD (General Medicine)       | Clinician                            |
| 4.      | Dr. Annie Kuriyan Thadicaren | MD, DGO                     | Clinician                            |
| 5.      | Dr. C.V. Andrews             | MS (Ophthalmology)          | Clinician                            |
| 6.      | Dr. Mariam Koshi Thomas      | MD, DA (Anesthesiology)     | Clinician                            |
| 7.      | Dr. V.K. Ramankutty          | MD (Forensic Medicine)      | Clinician                            |
| 8.      | Dr. Alex Joseph              | MS (Ophthalmology)          | Clinician                            |
| 9.      | Dr. M.V. Suresh              | MS (General Surgery)        | Clinician                            |
| 10.     | Dr. Biju Bahuleyan           | MD (Physiology)             | Basic Medical Scientist              |
| 11.     | Adv. Anto Davis A            | B. Sc, LLB                  | Legal Expert                         |
| 12.     | Mr. Sijo Jose                | MSW                         | Lay Person                           |
| 13.     | Fr. Baiju Chakkery           | BA, MSW                     | Social Scientist                     |
| 14.     | Dr. Kumudam Unni             | B.Sc, PhD                   | Scientific Member                    |
| 15.     | Dr. Angela Gnanadurai        | M.Sc, PhD                   | Scientific Member                    |

**Dr. G. N. Singh**  
**(Dr. G. N. Singh)**  
**Drugs Controller General (I) & Licensing Authority**

Drugs Controller General (India)  
Dte. General of Health Services  
Ministry of Health & Family Welfare  
FDA Bhawan, Kotla Road, I.T.O.  
New Delhi-110002
